# Supplementary material
Source: PubMed Central journal article supplement (PMC4174340)
Supplement: NIHMS628214-supplement-supplement_1.pdf [file NIHMS628214-supplement-supplement_1.pdf]

Supporting Information:

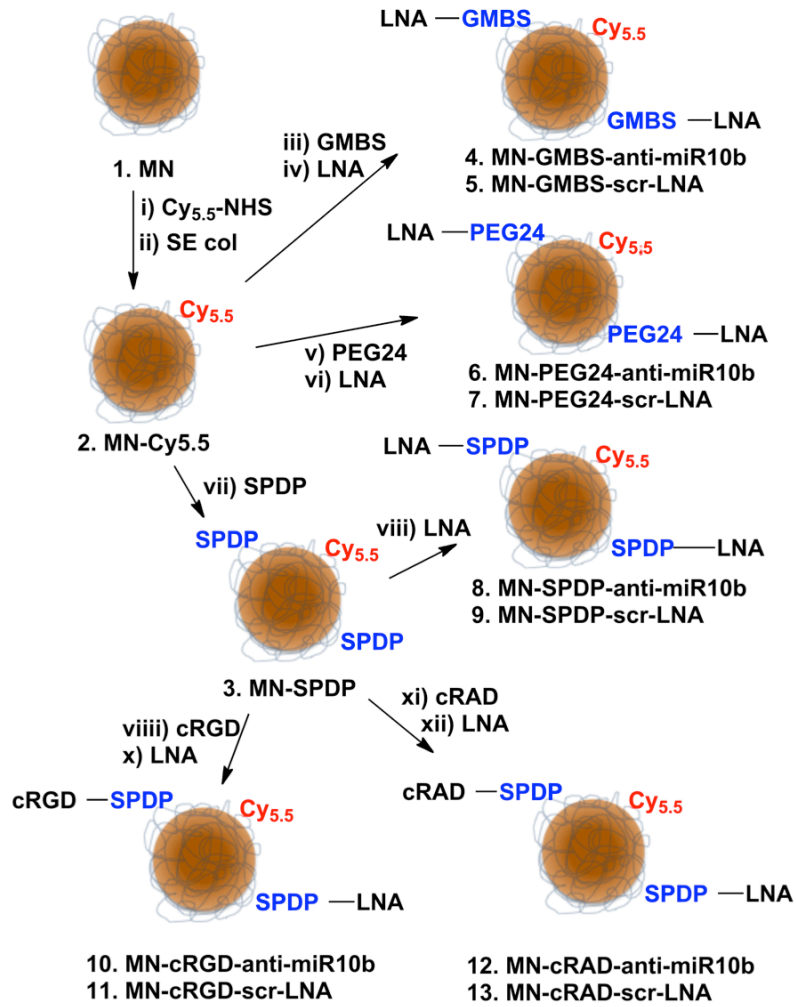

Figure S1. Synthetic scheme of nanodrugs.

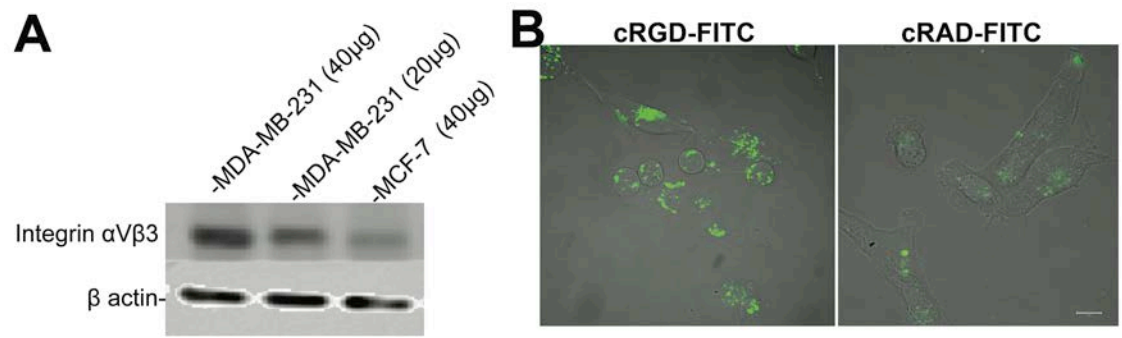

Figure S2. Cell line characterization.
